# Supplementary material for: Soil activity and microbial community response to nanometal oxides were not due exclusively to a particle size effect
Source: Royal Society of Chemistry journal article supplement (doi:10.1039/d2en00762b), 2022-12-09
Supplement: d2en00762b1.pdf [file d2en00762b1.pdf]

## *Supplementary Material*

# Soil activity and microbial community response to nanometal oxides were not due exclusively to a particle size effect

Helena Avila-Arias,<sup>1,2</sup> Loring F. Nies,<sup>3</sup> Marianne Bischoff Gray,<sup>1</sup> Emiliano Barreto-Hernández,<sup>4</sup> and Ronald F. Turco<sup>1\*</sup>

<sup>1</sup>Department of Agronomy, Purdue University, West Lafayette, IN, 47907, USA

<sup>2</sup>Ecological Sciences and Engineering Interdisciplinary Graduate Program, Purdue University, West Lafayette, IN, 47907, USA

<sup>3</sup>School of Civil Engineering & Environmental and Ecological Engineering, Purdue University, West Lafayette, Indiana 47907, USA

<sup>4</sup>Bioinformatics Group, Biotechnology Institute, Universidad Nacional de Colombia, Bogotá, Colombia

**\* Corresponding Author:** Ronald F. Turco  
Professor  
Department of Agronomy  
College of Agriculture  
Purdue University  
915 W. State Street  
West Lafayette, IN 47907  
+1 (765) 494-8077 (tel)  
+1 (765) 496-2926 (fax)  
rturco@purdue.edu

**Table S1.** Extracellular enzymes assayed in soil exposed to metal oxides. Abbreviation in this study, commission number (EC), function, common substrates, and corresponding substrate for fluorometric analysis are presented.

| Enzyme                                        | Abbreviation / EC | Enzyme function                                                                                                            | Common substrates                                                                                                                                                                                       | Substrate proxy                                                  |
|-----------------------------------------------|-------------------|----------------------------------------------------------------------------------------------------------------------------|---------------------------------------------------------------------------------------------------------------------------------------------------------------------------------------------------------|------------------------------------------------------------------|
| Acid phosphatase                              | AP<br>/ 3.1.3.2   | Involved in organic P mineralization. Hydrolyze phosphomonoesters releasing phosphate groups.                              | Phosphomonoesters (e.g., mononucleotide, sugar phosphates) and others (e.g., $\beta$ -glycerophosphate, phenylphosphate, $\beta$ -naphthyl phosphate, and <i>p</i> -nitrophenyl phosphate) <sup>1</sup> | 4-methylumbelliferyl-phosphate                                   |
| $\beta$ -1,4-glucosidase                      | BG<br>/ 3.2.1.21  | Involved in cellulose degradation.<br><br>Hydrolysis of $\beta$ -D-glucopyranosides to glucose.                            | Cellobiose and other $\beta$ -1,4-glucans.                                                                                                                                                              | 4-methylumbelliferyl- $\beta$ -D-glucoside                       |
| $\beta$ -1,4- <i>N</i> -acetylglucosaminidase | NAG<br>/ 3.2.1.14 | Hydrolysis of terminal, non-reducing $\beta$ -N-Acetylglucosamine residues from oligosaccharides into N-acetylglucosamine. | Chitooligosaccharides.                                                                                                                                                                                  | 4-methylumbelliferyl- <i>N</i> -acetyl- $\beta$ -D-glucosaminide |

**Table S2.** Reactions to determine extracellular soil enzymes fluorometrically, according to Saiya-Cork *et al.*, 2002.<sup>2</sup>

| Reagent ( $\mu$ l)         | Blank | Negative control | Quench standard | Reference standard | Sample |
|----------------------------|-------|------------------|-----------------|--------------------|--------|
| 200 mM substrate solution* |       | 50               |                 |                    | 50     |
| Acetate Buffer             | 50    | 200              |                 |                    |        |
| Sample suspension          | 200   |                  | 200             | 200                | 200    |
| Standard**                 |       |                  | 50              | 50                 |        |
| Final Volume               |       |                  | 250             |                    |        |

\* 4-methylumbelliferyl- $\beta$ -D-glucoside for BG; 4-methylumbelliferyl-*N*-acetyl- $\beta$ -D-glucosaminide for NAG; and 4-methylumbelliferyl-phosphate for AP.

\*\*10 mM 4-methylumbelliferone

**Table S3.** Sequencing primers and thermocycler conditions for paired-end 16S rDNA V4/ITS1 community sequencing on the Illumina platform according to the protocols from the Earth Microbiome Project (<http://earthmicrobiome.org/>)

| Primer             | Illumina adapters                                                      | Primer sequence                                                       | Thermocycler conditions                            |
|--------------------|------------------------------------------------------------------------|-----------------------------------------------------------------------|----------------------------------------------------|
| <b>16S rRNA V4</b> |                                                                        |                                                                       |                                                    |
| Forward            | 5' Illumina adapter:<br>AATGATACGGCGACCACCGAGATCTACACG<br>CT           |                                                                       |                                                    |
|                    | Golay barcode: XXXXXXXXXXXXX                                           | 515FB forward primer<br>GTGYCAGCMGCCGCGGTAA                           | 94 °C for 3 min<br>35 cycles                       |
|                    | Forward primer pad: TATGGTAATT                                         |                                                                       | 94 °C for 45 s<br>50 °C for 60 s<br>72 °C for 90 s |
|                    | Forward primer linker: GT                                              |                                                                       |                                                    |
| Reverse            | Reverse complement of 3' Illumina adapter:<br>CAAGCAGAAGACGGCATACGAGAT |                                                                       | 72 °C for 10 min<br>4 °C hold                      |
|                    | Reverse primer pad: AGTCAGCCAG                                         | 806RB reverse primer<br>GGACTACNVGGGTWTCTAAT                          |                                                    |
|                    | Reverse primer linker: CC                                              |                                                                       |                                                    |
| <b>ITS</b>         |                                                                        |                                                                       |                                                    |
| Forward            | 5' Illumina adapter:<br>AATGATACGGCGACCACCGAGATCTACAC                  | ITS1-F forward primer<br>TTGGTCATTTAGAGGAAGTA<br>AAAGTCGTAACAAGGTTTCC | 94 °C for 1 min<br>35 cycles                       |
|                    | Forward primer linker: GG                                              |                                                                       | 94 °C for 30 s<br>52 °C for 30 s<br>68 °C for 30 s |
| Reverse            | Reverse complement of 3' Illumina adapter:<br>CAAGCAGAAGACGGCATACGAGAT | ITS2 Reverse Primer<br>CGTTCTTCATCGATGCVAGAR<br>CCAAGAGATC            | 68 °C for 7 min<br>4 °C hold                       |
|                    | Golay barcode: NNNNNNNNNNNN                                            |                                                                       |                                                    |
|                    | Reverse prime linker: CG                                               |                                                                       |                                                    |

**Table S4.** Abundance of prokaryotic (16S rDNA gene V4) and fungal (ITS1) phyla in survey dataset.

| Kingdom  | Phylum                 | ASVs per phylum (%) |
|----------|------------------------|---------------------|
| Bacteria | Proteobacteria         | 18.78               |
| Bacteria | Bacteroidota           | 15.63               |
| Bacteria | Acidobacteriota        | 13.19               |
| Bacteria | Actinobacteriota       | 8.90                |
| Bacteria | Chloroflexi            | 8.71                |
| Bacteria | Myxococcota            | 7.47                |
| Bacteria | Verrucomicrobiota      | 7.31                |
| Bacteria | Planctomycetota        | 6.06                |
| Bacteria | Gemmatimonadota        | 3.41                |
| Bacteria | Bdellovibrionota       | 2.03                |
| Bacteria | Armatimonadota         | 1.46                |
| Bacteria | Firmicutes             | 1.43                |
| Bacteria | Latescibacterota       | 0.78                |
| Bacteria | Patescibacteria        | 0.78                |
| Bacteria | Elusimicrobiota        | 0.75                |
| Bacteria | Cyanobacteria          | 0.42                |
| Bacteria | Desulfobacterota       | 0.39                |
| Archaea  | Crenarchaeota          | 0.34                |
| Bacteria | Methylomirabilota      | 0.29                |
| Bacteria | RCP2-54                | 0.29                |
| Bacteria | Abditibacteriota       | 0.21                |
| Bacteria | Dependentiae           | 0.21                |
| Bacteria | Nitrospirota           | 0.21                |
| Bacteria | Fibrobacterota         | 0.18                |
| Bacteria | Spirochaetota          | 0.18                |
| Bacteria | Sumerlaeota            | 0.18                |
| Bacteria | FCPU426                | 0.13                |
| Bacteria | NB1-j                  | 0.10                |
| Bacteria | WPS-2                  | 0.08                |
| Archaea  | Nanoarchaeota          | 0.03                |
| Bacteria | Entothaeonellaeota     | 0.03                |
| Bacteria | Fusobacteriota         | 0.03                |
| Bacteria | SAR324_clade           | 0.03                |
| Fungi    | Ascomycota             | 48.92               |
| Fungi    | unidentified           | 24.22               |
| Fungi    | Basidiomycota          | 12.94               |
| Fungi    | Mortierellomycota      | 9.21                |
| Fungi    | Glomeromycota          | 2.25                |
| Fungi    | Chytridiomycota        | 0.87                |
| Fungi    | Rozellomycota          | 0.66                |
| Fungi    | Mucoromycota           | 0.36                |
| Fungi    | Kickxellomycota        | 0.30                |
| Fungi    | Zoopagomycota          | 0.12                |
| Fungi    | Calcarisporiellomycota | 0.06                |
| Fungi    | Monoblepharomycota     | 0.06                |
| Fungi    | Basidiobolomycota      | 0.03                |

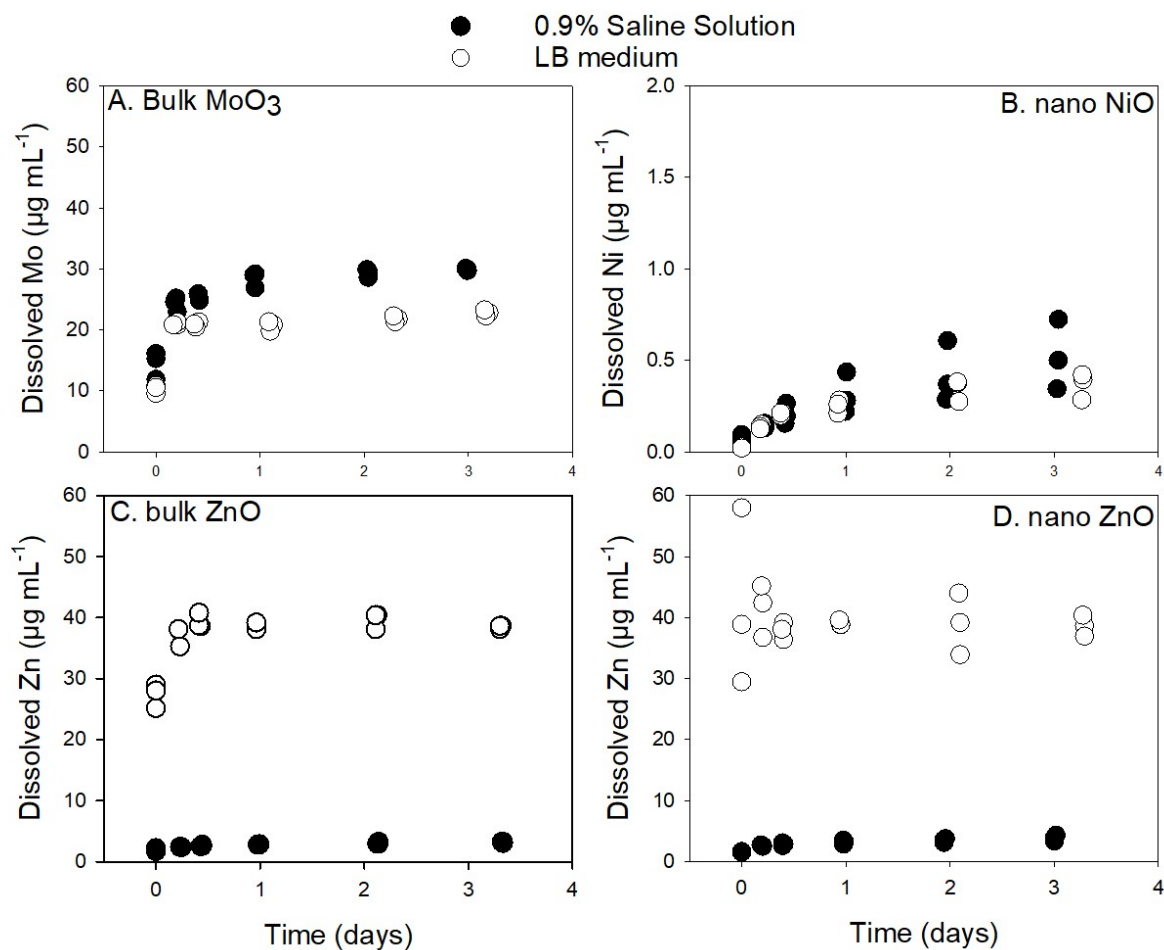

**Figure S1.** Dissolution curves of (A) bulk $\text{MoO}_3$ , (B) nano $\text{NiO}$ , (C) bulk $\text{ZnO}$ , and (D) nano $\text{ZnO}$ , at  $50 \mu\text{g mL}^{-1}$ , in 0.9% saline solution and LB medium. Notice that scale in Y axis for nano $\text{NiO}$  (B) is different. Solubility of nano $\text{MoO}_3$  and bulk $\text{NiO}$  was negligible.

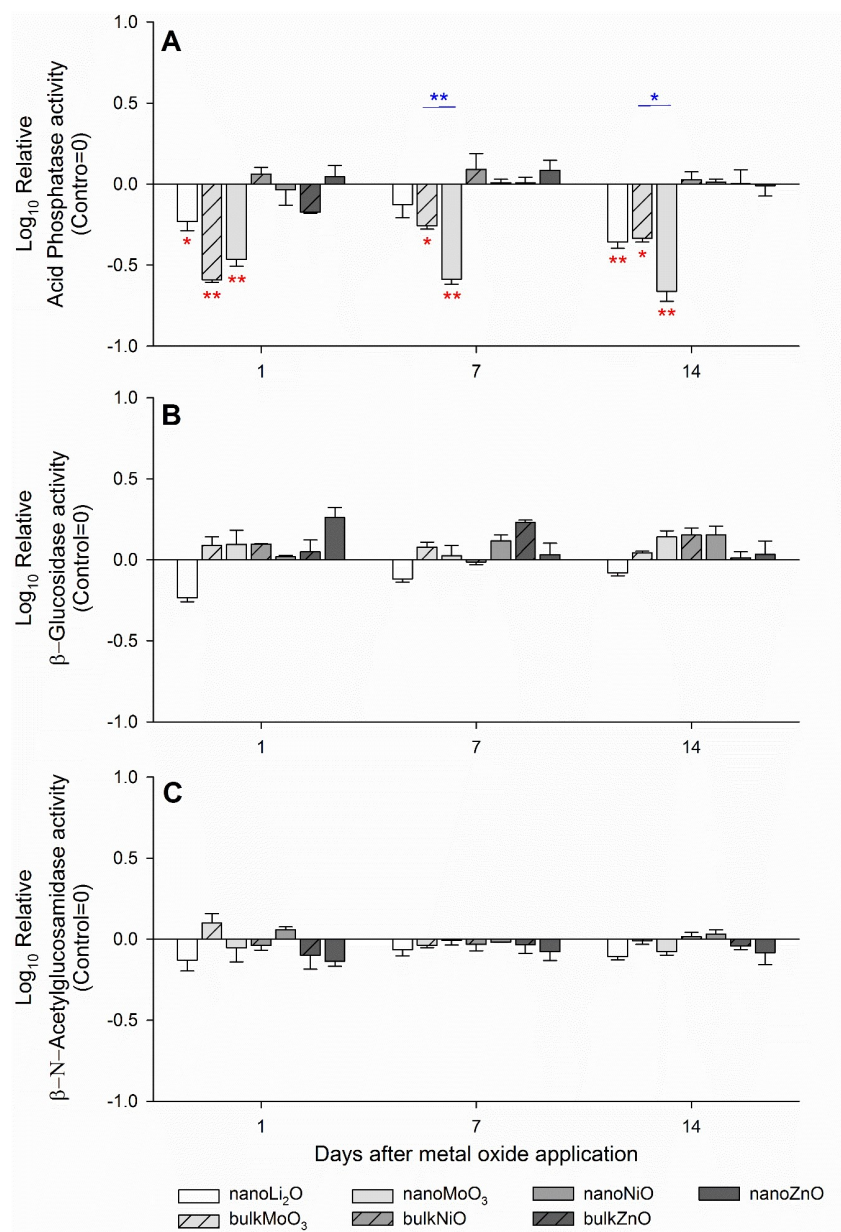

**Figure S2.** Soil acid phosphatase (A),  $\beta$ -glucosidase (B), and  $\beta$ -N-acetylglucosamidase (C) activity in soil under nanoLi<sub>2</sub>O, (bulk and nano) MoO<sub>3</sub>, (bulk and nano) NiO, and (bulk and nano) ZnO. Control was soil with no metal oxide addition. Base 10 logarithm of the relative response (i.e., soil response to metal oxide / response of soil control) are presented, where positive and negative numbers represent an increase or decrease in activity, respectively. Error bars represent  $\pm 1$  standard error (n=3). Asterisk(s) and underlined asterisk(s) represent significance of treatment (metal oxide vs control) and size (bulk vs nano) effect, respectively. One or two asterisks identify significant difference ( $p < 0.05$ ) or highly significant difference ( $p < 0.001$ ), respectively.

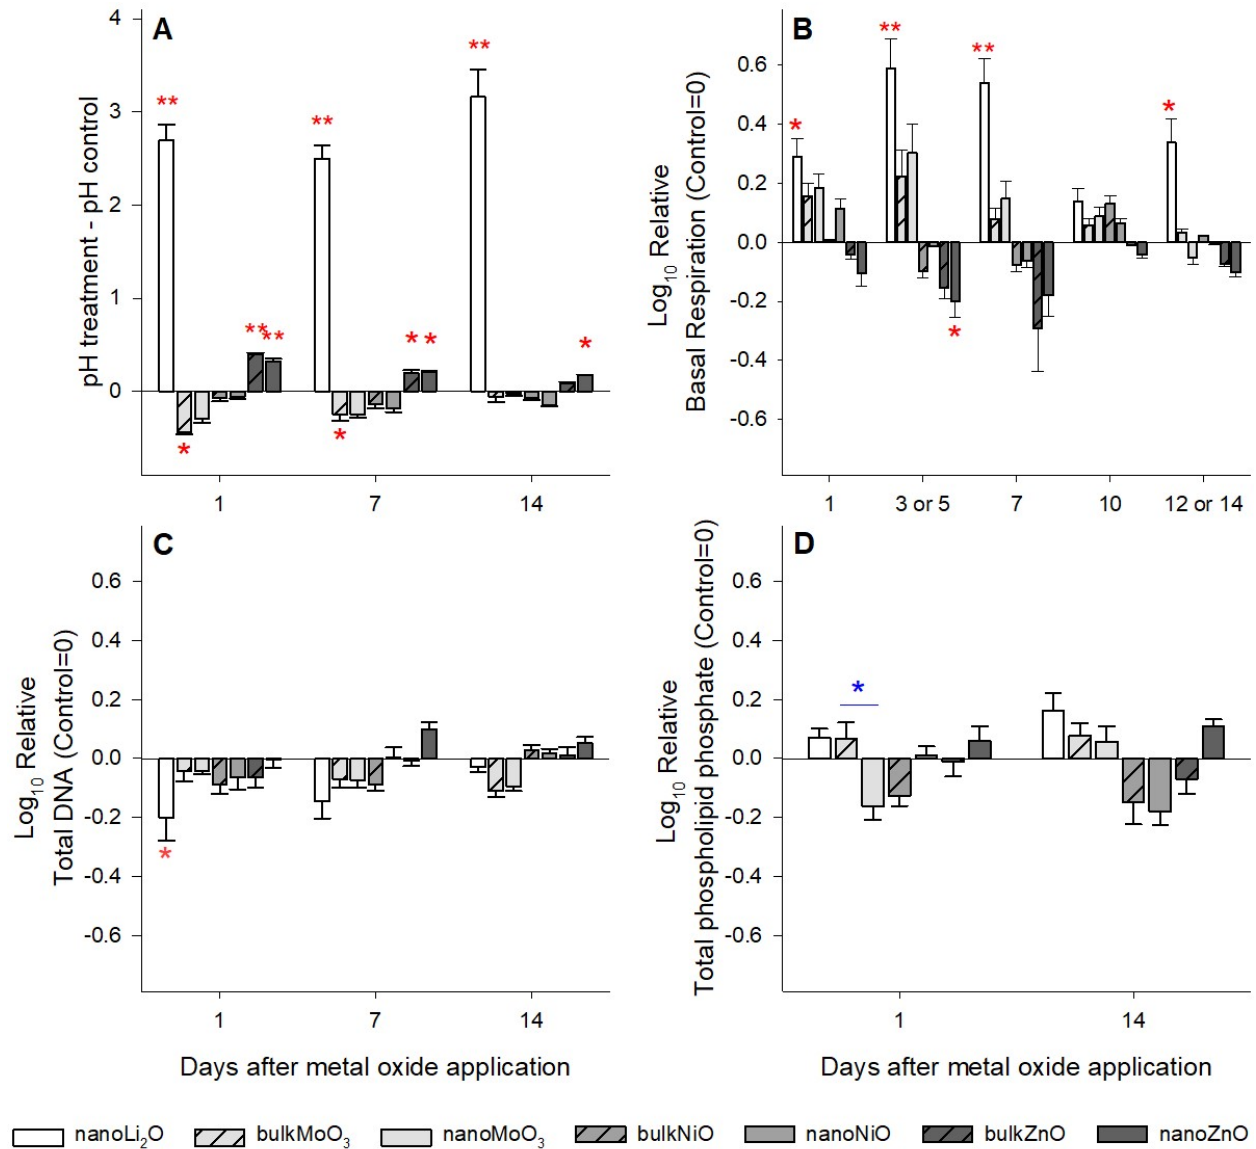

**Figure S3.** Soil responses to metal oxide addition on pH (A), soil basal respiration (B), total DNA (C), and biomass as total phospholipid phosphate (D) during 14 days of incubation. Control was soil with no metal oxide addition. Except for pH, base 10 logarithm of the relative response (i.e., soil response to metal oxide / response of soil control) are presented, where positive and negative numbers represent an increase or decrease in activity, respectively. Asterisk(s) and underlined asterisk(s) represent significance of treatment (metal oxide vs control) and size (bulk vs nano) effect, respectively. One or two asterisks identify significant difference ( $p < 0.05$ ) or highly significant difference ( $p < 0.001$ ), respectively.

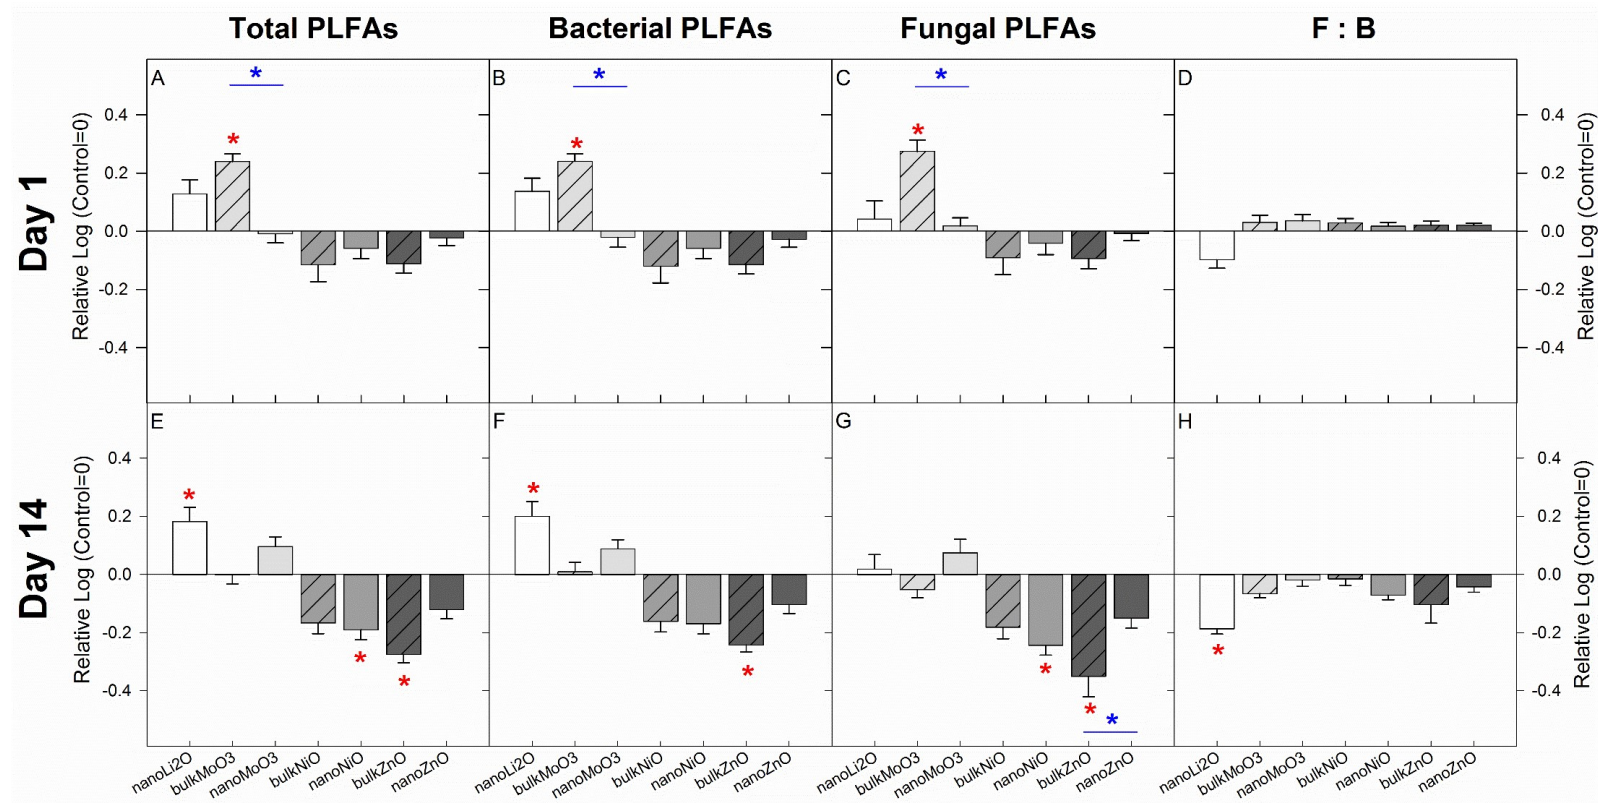

**Figure S4.** Soil microbial biomass of total (A and E), bacterial (B and F), fungal (C and G) and fungal:bacterial ratio (F:B in D and H) of PLFAs in soils 1 and 14 days after metal oxide application. Control was soil with no metal oxide addition. Logarithm (base 10) of the relative response (i.e., soil response to metal oxide / response of soil control) are presented, where positive and negative numbers represent an increase or decrease in activity, respectively. Error bars represent  $\pm 1$  standard error ( $n=3$ ). Asterisk(s) and underlined asterisk(s) represent significance of treatment (metal oxide vs. control) and size (bulk vs. nano) effect, respectively. One asterisk identifies significant differences ( $p<0.05$ ).



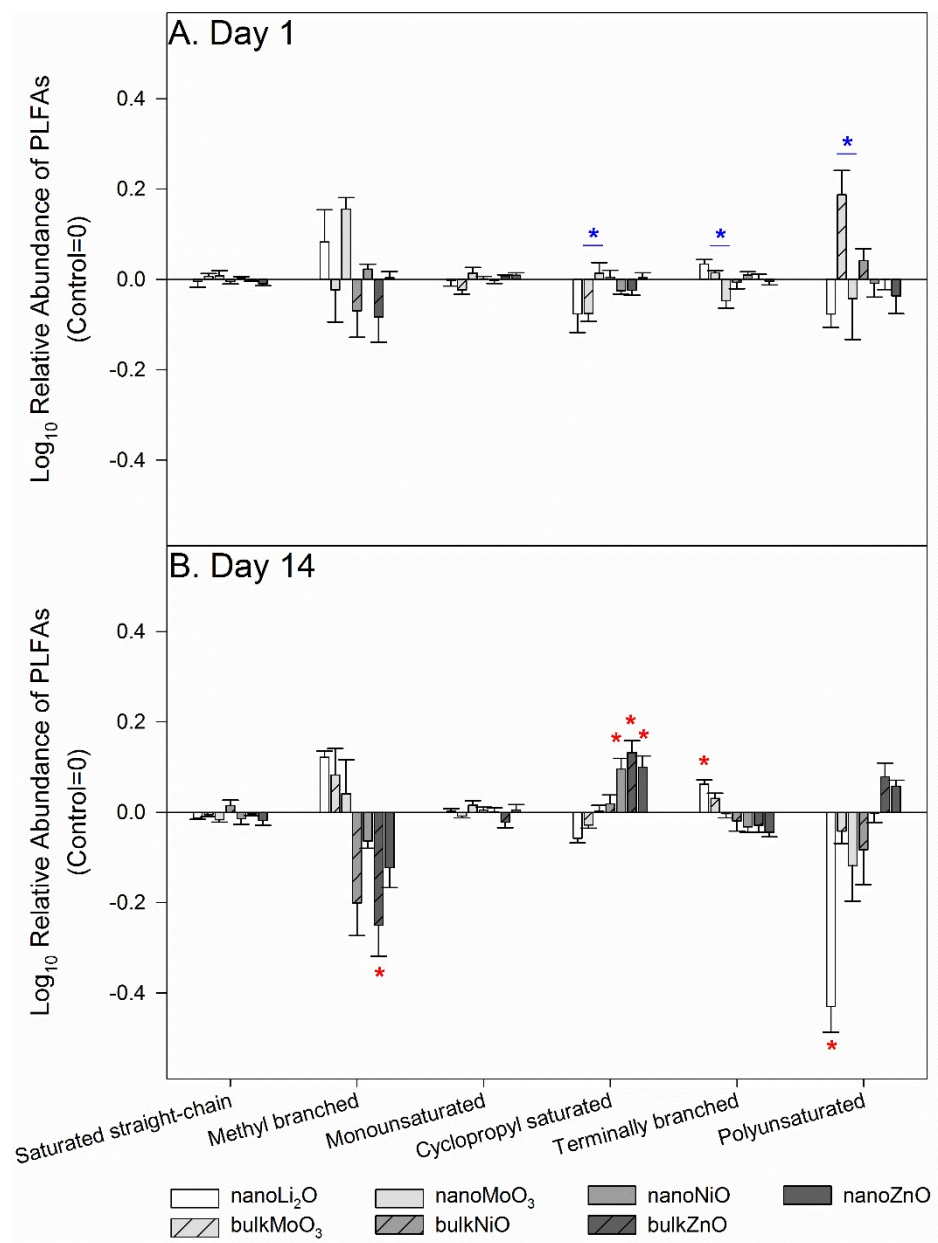

**Figure S5.** PLFAs groups in soils 1 (A) and 14 (B) days after metal oxide application. Control was soil with no metal oxide addition. Base 10 logarithm of the relative response (i.e., soil response to metal oxide / response of soil control) are presented, where positive and negative numbers represent an increase or decrease in activity, respectively. Error bars represent  $\pm 1$  standard error ( $n=3$ ). Asterisk(s) and underlined asterisk(s) represent significance of treatment (metal oxide vs control) and size (bulk vs nano) effect, respectively. One asterisk identifies significant differences ( $p < 0.05$ ).

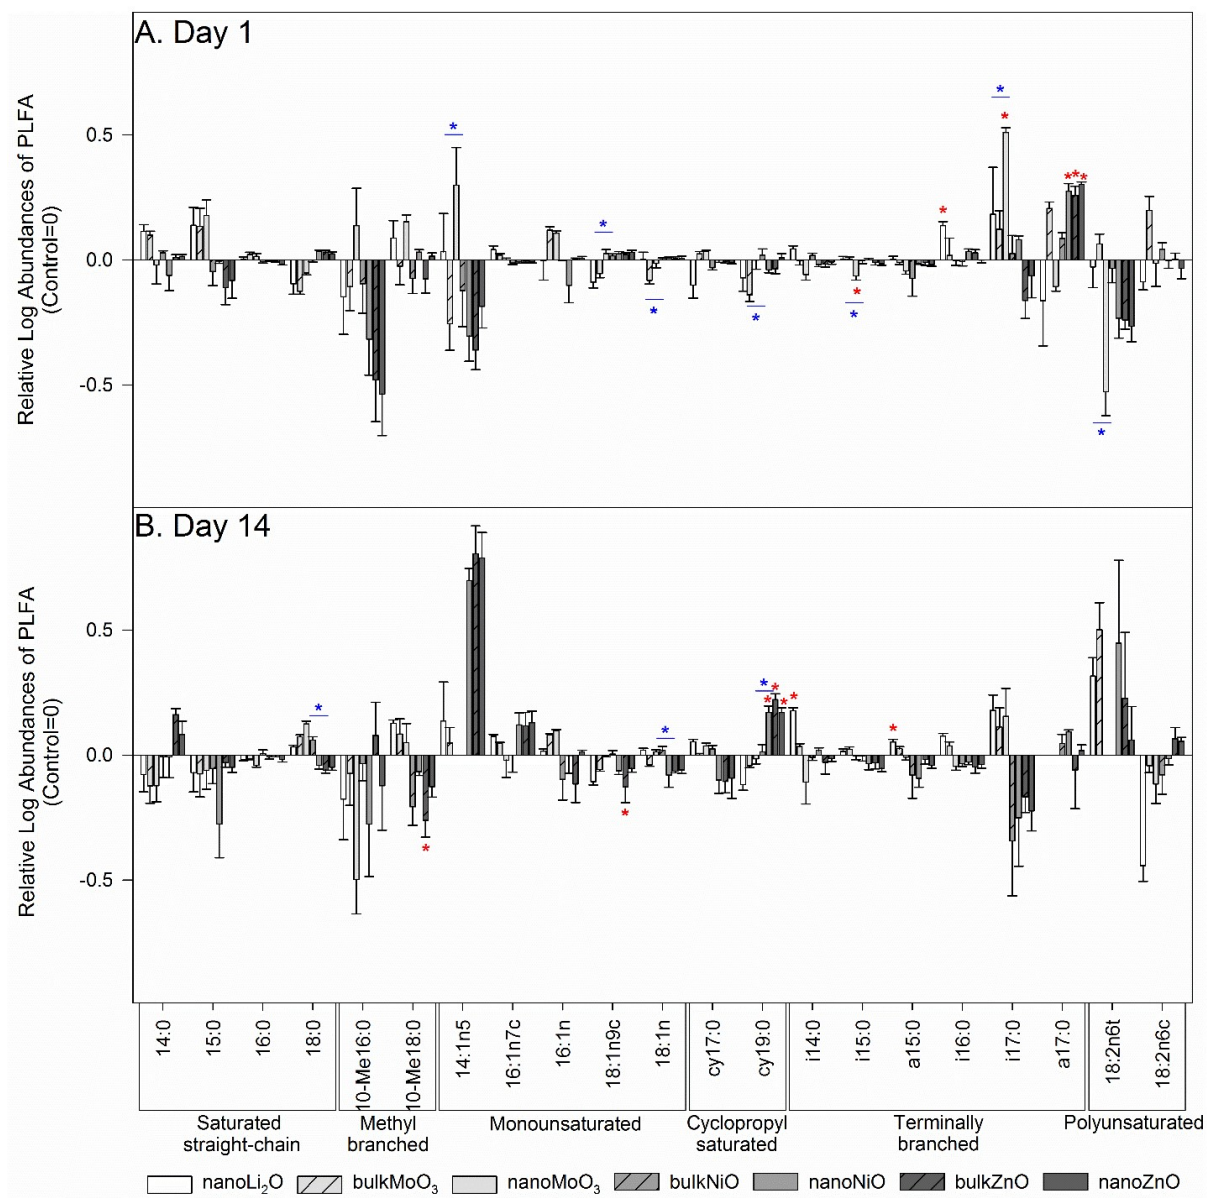

**Figure S6.** Individual PLFAs in soils 1 (A) and 14 (B) days after metal oxide application. Control was soil with no metal oxide addition. Base 10 logarithm of the relative response (i.e., soil response to metal oxide / response of soil control) are presented, where positive and negative numbers represent an increase or decrease in activity, respectively. Error bars represent  $\pm 1$  standard error ( $n=3$ ). Asterisk(s) and underlined asterisk(s) represent significance of treatment (metal oxide vs. control) and size (bulk vs nano) effect, respectively. One asterisk identifies significant differences ( $p<0.05$ ).

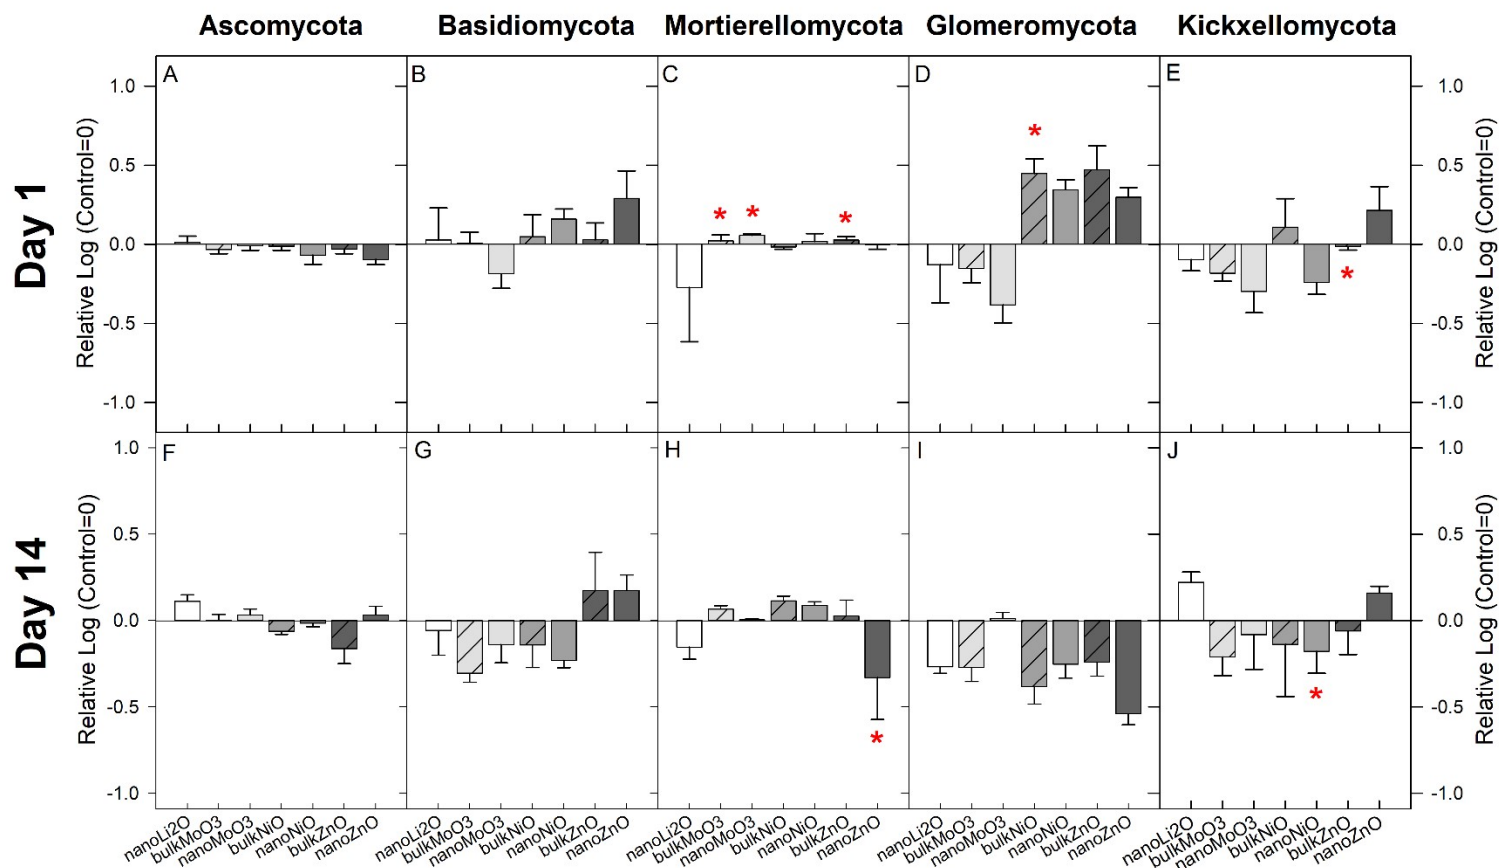

**Figure S7.** Differential abundance analysis of fungal (ITS1) phyla in soils, 1 and 14 days after metal oxide application. Control was soil with no metal oxide addition. Logarithm (base 10) of the relative response (i.e., soil response to metal oxide / response of soil control) are presented, where positive and negative numbers represent an increase or decrease in activity, respectively. Error bars represent  $\pm 1$  standard error ( $n=3$ ). Asterisk(s) and underlined asterisk(s) represent significance of treatment (metal oxide vs. control) and size (bulk vs. nano) effect, respectively. One asterisk identifies significant differences ( $p<0.05$ ).

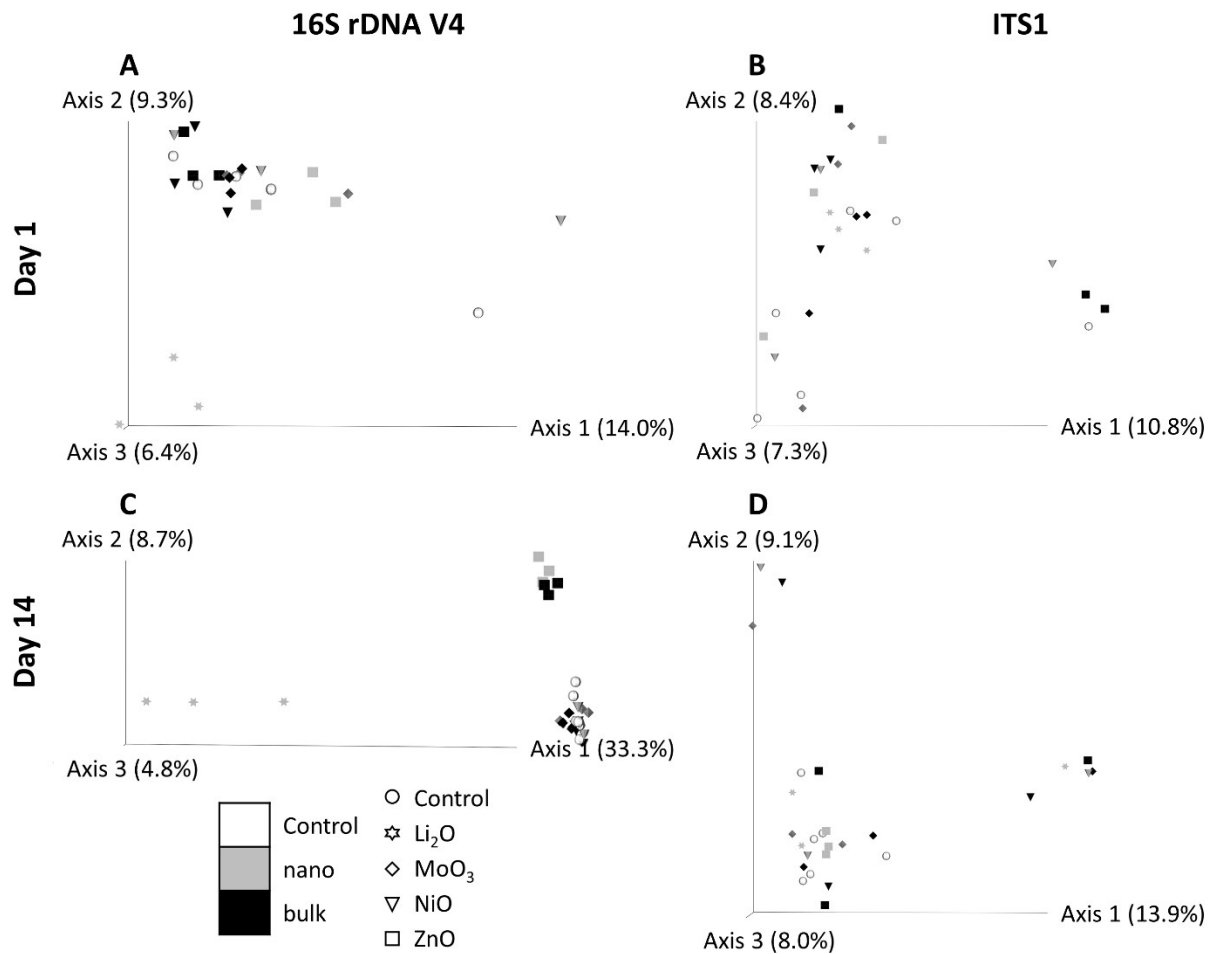

**Figure S8.** Principal coordinate analysis depicting the quantitative Bray-Curtis distances of the 16S rDNA gene V4 (A and C) and ITS1 (B and D) sequences in soils, 1 (A and B) and 14 (C and D) days after exposure to metal oxides. Percentages in axes represent variation explained by the components. No statistical differences ( $p < 0.05$ ) in  $\beta$ -diversity metrics between control and metal oxide were observed (Table 5).

## References

1. M. A. Tabatabai, in *Methods of Soil Analysis, Part 2. Microbiological and Biochemical Properties*, eds. R. W. Weaver, S. Angle and P. Bottomley, Soil Science Society of America, Madison, WI 53711, 1994, DOI: 10.2136/sssabookser5.2.c37, ch. 37, pp. 775-833.
2. K. R. Saiya-Cork, R. L. Sinsabaugh and D. R. Zak, *Soil Biology and Biochemistry*, 2002, **34**, 1309-1315.
